# Supplementary material for: Cell identity and nucleo-mitochondrial genetic context modulate OXPHOS performance and determine somatic heteroplasmy dynamics
Source: PubMed Central journal article supplement — Sci Adv. 2020 Jul 29;6(31):eaba5345. doi: 10.1126/sciadv.aba5345 (PMC7439646; doi:10.1126/sciadv.aba5345), 2020-07-29
Supplement: aba5345_SM.pdf [file aba5345_SM.pdf]

## Supplementary Materials for

### **Cell identity and nucleo-mitochondrial genetic context modulate OXPHOS performance and determine somatic heteroplasmy dynamics**

Ana Victoria Lechuga-Vieco, Ana Latorre-Pellicer, Iain G. Johnston, Gennaro Prota, Uzi Gileadi, Raquel Justo-Méndez, Rebeca Acín-Pérez, Raquel Martínez-de-Mena, Jose María Fernández-Toro, Daniel Jimenez-Blasco, Alfonso Mora, Jose A. Nicolás-Ávila, Demetrio J. Santiago, Silvia G. Priori, Juan Pedro Bolaños, Guadalupe Sabio, Luis Miguel Criado, Jesús Ruíz-Cabello, Vincenzo Cerundolo, Nick S. Jones, José Antonio Enríquez\*

\*Corresponding author. Email: [jaenriquez@cnic.es](mailto:jaenriquez@cnic.es)

Published 29 July 2020, *Sci. Adv.* **6**, eaba5345 (2020)  
DOI: 10.1126/sciadv.aba5345

#### **This PDF file includes:**

Figs. S1 to S3



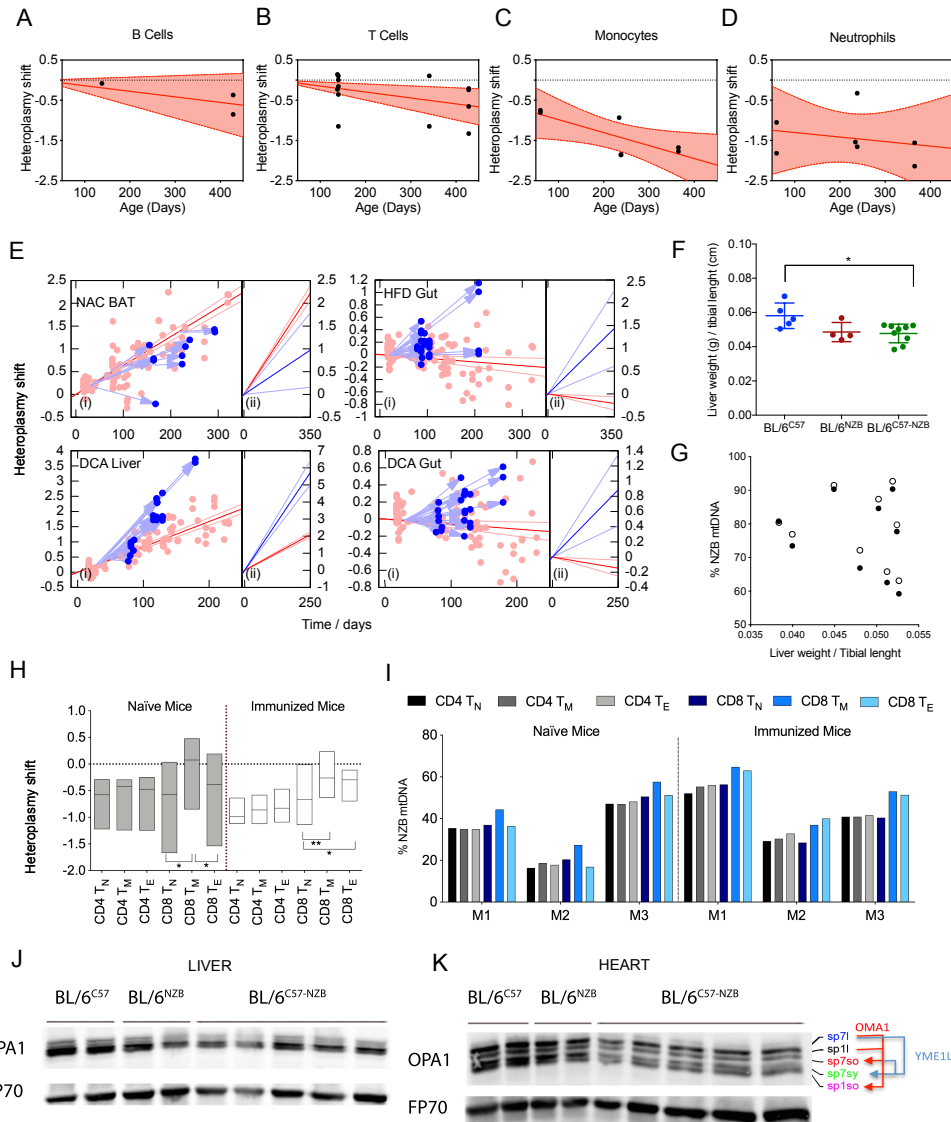

**Fig. S2. Evaluation of mtDNA segregation using different environmental interventions.** (A-D) Transformed heteroplasmy shift using tail as the reference tissue in different cell populations from heteroplasmic mice: B cells (A), lymphocytes (B), monocytes (C) and neutrophils (D). Each dot represents a different individual. (E) Individual tissues showing a significant difference in segregation with the indicated experimental intervention. Main panels (i): pink points and lines (mean and 95% c.i.s) show the inferred segregation behavior in control mice, relative to eye. Blue vectors show the effects of the indicated experimental treatment (vector starts at treatment onset). Blue points show final heteroplasmy measurements for perturbed mice. Side panels (ii) show the inferred segregation behavior with (blue) and without (pink) treatment, with 95% confidence intervals. (F) Weight recovery of the liver after 15 days post-hepatectomy. Each dot corresponds to a different individual. (G) Measured percentage of NZB mtDNA in liver before and after hepatectomy (15 days post-surgery). Filled dots are measurements before surgery and empty dots correspond to the amount of NZB mtDNA after liver regeneration. (H) Heteroplasmic shift in different CD4+ and CD8+ T cell populations in naïve and immunized mice (n=6 for CD8+ T cells and n=3 for CD4+ T cells). (I) Individual mouse analysis of the percentage of NZB mtDNA in T cell subsets in naïve and immunized mice. TN: naïve T cells. TM: memory T cells; TE: effector T cells. M: mouse. (J, K) Western blots against OPA1 revealing the distribution between the two isoforms (sp7l and sp1l) and its proteolytic derived forms by either YME1L or OMA1 (see legend) either in liver (J) or Heart (K) of the different homoplasmic and heteroplasmic mice. Analyses performed in 15-week-old mice. (A-D) \*\*  $P < 0.01$  linear regression coefficient and (F, H) \*  $P < 0.05$ , \*\*  $P < 0.01$ , ANOVA test.

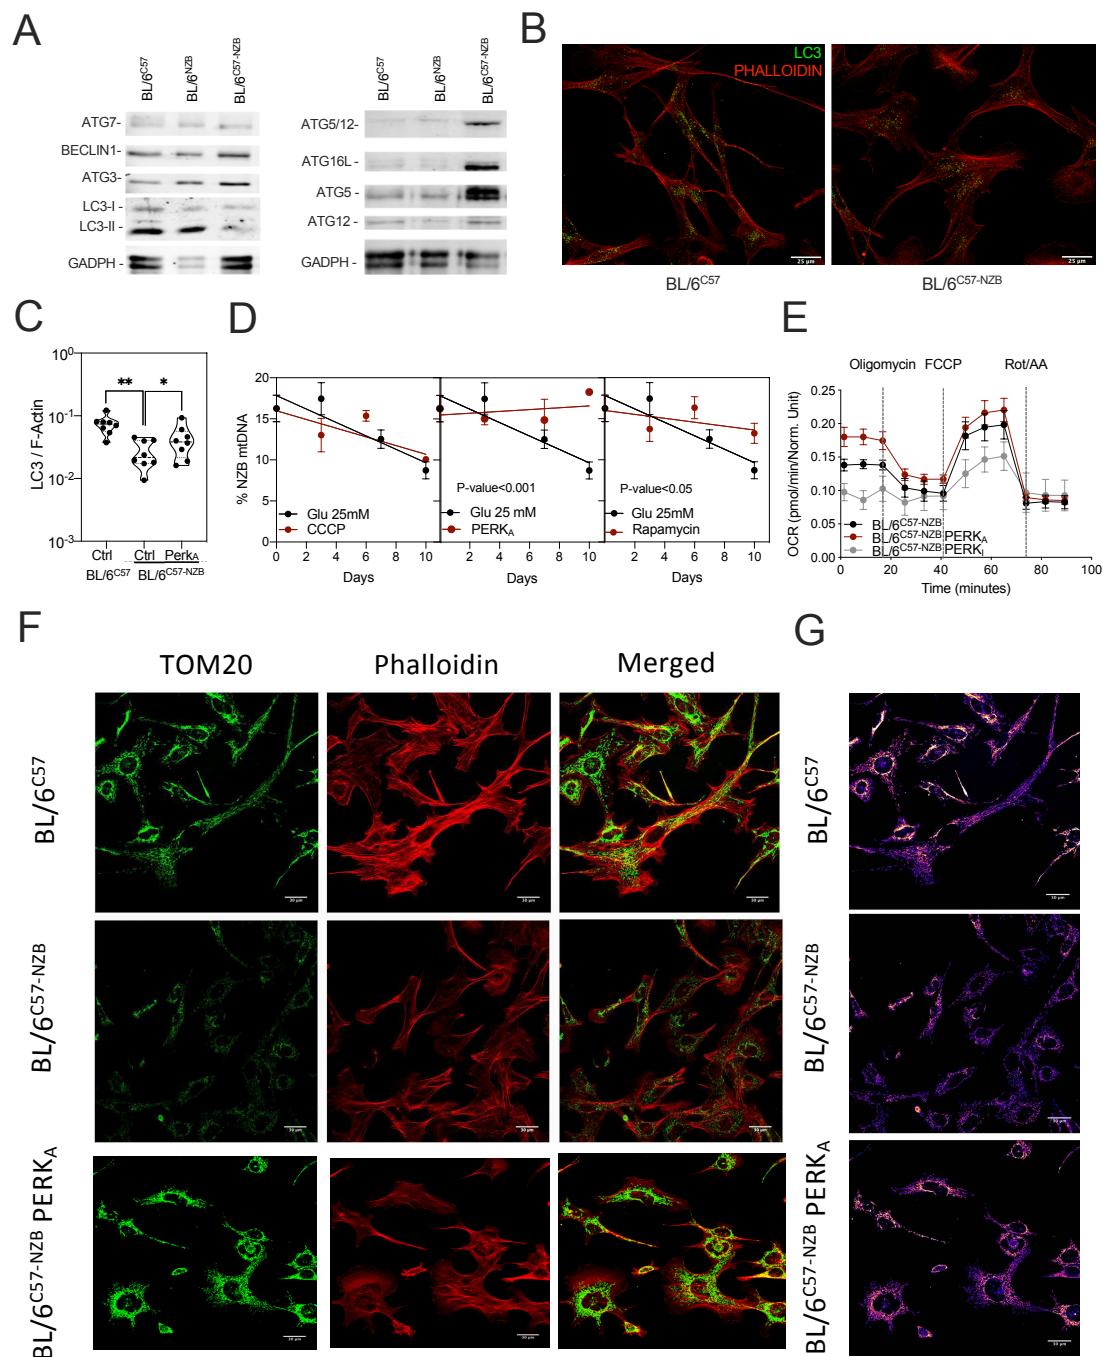

**Fig. S3. Confocal imaging analysis of MAF mitochondrial network.** (A) Autophagy-related proteins analysis by Western Blot in homoplasmic (BL/6C57 and BL/6N2B) and heteroplasmic MAFs (BL/6C57-N2B). Images are representative from two independent experiments. (B) Immunofluorescence images of LC3 (green) and phalloidin (F-actin, red) in homoplasmic (BL/6C57) and heteroplasmic (BL/6C57-N2B) MAFs. Scale bar, 25  $\mu$ m (C) Quantification of LC3 levels normalized by the total amount of F-Actin (data obtained from images in b). Violin plot showing all points. Each point represents an individual measure. \* $P < 0.05$ , \*\*\* $P < 0.001$ , one-way ANOVA with Tukey's multiple comparisons test. (D) Modulation of the dynamics of mtDNA segregation in MAFs using different autophagy-related drugs (final concentration 1  $\mu$ M). Bars show means  $\pm$  SD,  $n = 2-3$  technical replicates. (E) Oxygen consumption rate (OCR) profiles determined by Seahorse<sup>TM</sup> in control heteroplasmic MAFs and cells treated for 7 days with PERK. (F) Confocal images of TOM20 (green), Phalloidin (red), and merged images for BL/6C57, BL/6C57-N2B, and BL/6C57-N2B PERK<sub>A</sub>. (G) Confocal images of TOM20 (green) and DAPI (blue) for the same genotypes.

activator (CCT020312, 1 $\mu$ M final concentration) and PERK inhibitor (GSK2606414, 1 $\mu$ M final concentration). Bars show means  $\pm$  SEM, n=6 technical replicates of each cell clone. **(F-G)** Confocal imaging analysis of MAF mitochondrial networks. **(F)** Confocal imaging of mitochondrial network. TOM20: outer mitochondrial membrane marker in green. Phalloidin: F-actin marker, in red. Scale bar, 30  $\mu$ m. **(G)** Densitometric image analysis of mitochondrial network distribution within the cells using TOM20 as mitochondrial marker. Purple: low mitochondrial density. Yellow: high mitochondrial density. Scale bar, 30  $\mu$ m.
